# Supplementary material for: A ratiometric fluorescence assay for bleomycin based on Cu2+-triggered cascade reactions and nanoparticle-mediated autocatalytic reactions
Source: Royal Society of Chemistry journal article supplement (doi:10.1039/d1nj02111g), 2021-01-01
Supplement: d1nj02111g1.pdf [file d1nj02111g1.pdf]

**Electronic Supporting Material on the New Journal of Chemistry**  
**publication entitled**

**A ratiometric fluorescence assay for bleomycin based on Cu<sup>2+</sup>-triggered cascade  
reaction and nanoparticles-mediated autocatalytic reaction**

Fujin Guo <sup>a</sup>, Meng Xia <sup>c</sup>, Jing Sun <sup>b</sup>, Shuyun Zhu <sup>c\*</sup>

<sup>a</sup> Key Laboratory of Food Processing Technology and Quality Control in Shandong Province, College of Food Science and Engineering, Shandong Agricultural University, Tai'an 271018, China.

<sup>b</sup> Qinghai Key Laboratory of Qinghai-Tibet Plateau Biological Resources, Northwest Institute of Plateau Biology, Chinese Academy of Sciences, Xining 810001, China.

<sup>c</sup> School of Chemistry and Chemical Engineering, Qufu Normal University, Qufu 273165, China.

\* Corresponding authours. E-mail: shuyunzhu1981@163.com (S. Zhu)

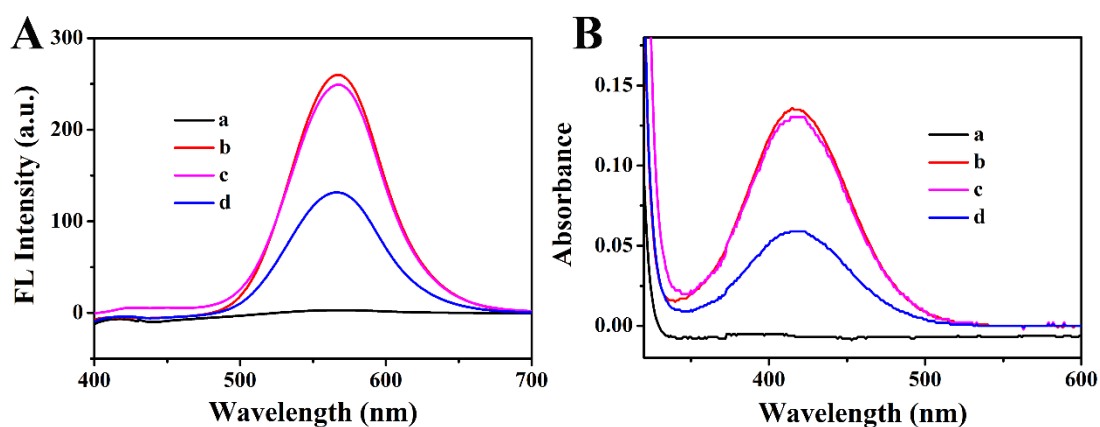

**Fig. S1** Fluorescence emission spectra (A) and absorption peak (B) of OPD (a), Cu<sup>2+</sup> + OPD (b), Cu<sup>2+</sup>-BLM + OPD (c), Cu<sup>2+</sup> + OPD + BLM (d). Inset: corresponding digital photos under the ultraviolet (A) and visible light (B). [Cu<sup>2+</sup>] = 2.0 μM; [OPD] = 1.8 mM; [AA] = 10.0 μM; [BLM] = 1.0 μM.

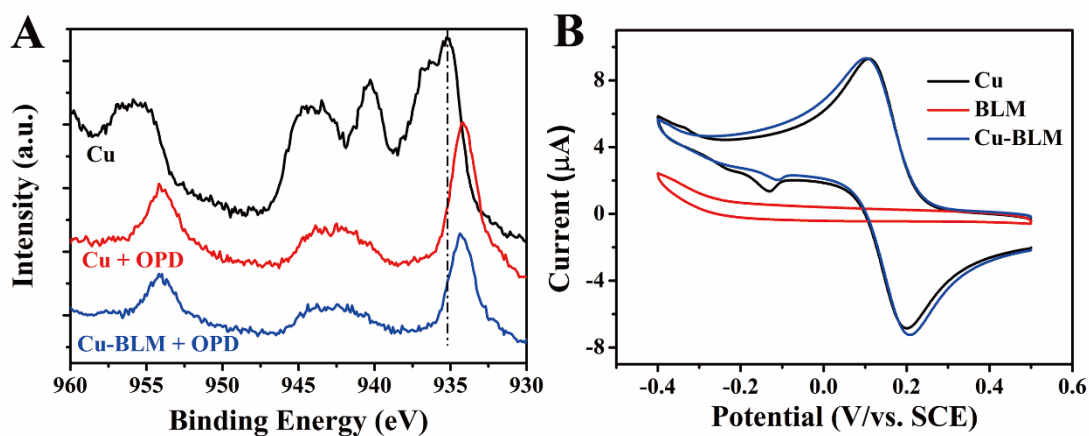

**Fig. S2** (A) XPS spectra of Cu 2p for the CuSO<sub>4</sub>, CuSO<sub>4</sub> with OPD, CuSO<sub>4</sub> with OPD and BLM. (B) The CVs of Cu<sup>2+</sup>, BLM, and Cu<sup>2+</sup> with BLM. Scan rate: 50 mV s<sup>-1</sup>.

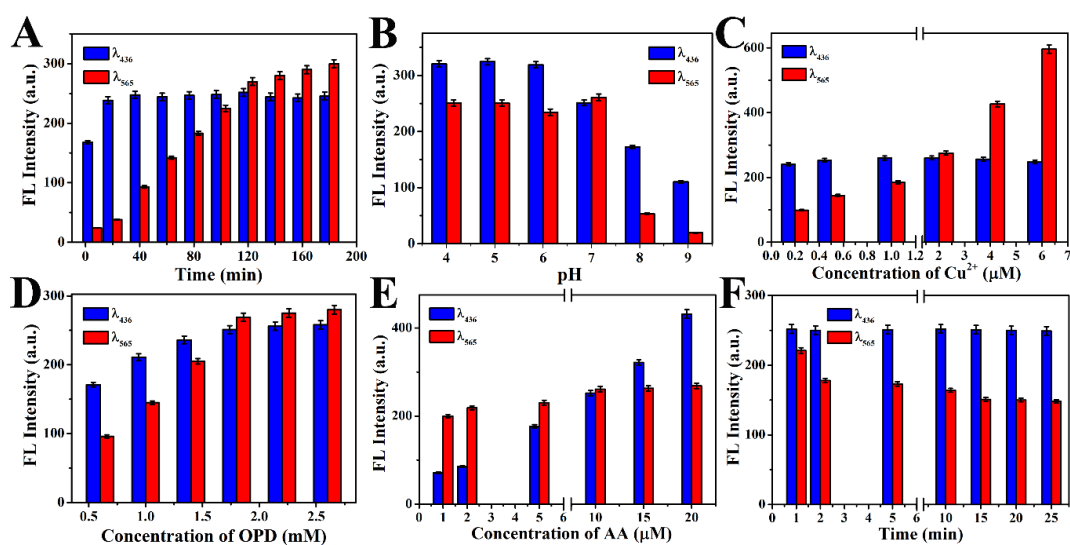

**Fig. S3** The influences of incubation time of Cu<sup>2+</sup>, OPD and AA (A), pH (B), concentration of Cu<sup>2+</sup> (C), concentration of AA (D), concentration of AA (E) and the reaction time between Cu<sup>2+</sup> and BLM (F) on the fluorescence intensities at 436 and 565, respectively. Error bars were estimated from three replicate measurements.

**Table S1** Analytical results of human serum samples.

| Sample No. | Amount of BLM<br>added (nM) | Amount of BLM<br>founded (nM) | Recovery<br>(%) | RSD<br>(%) |
|------------|-----------------------------|-------------------------------|-----------------|------------|
| 1          | 10.0                        | 9.2                           | 92.0            | 3.1        |
| 2          | 50.0                        | 47.4                          | 94.8            | 2.8        |
| 3          | 200.0                       | 192.8                         | 96.4            | 2.5        |
